# Supplementary material for: Robust hematopoietic specification requires the ubiquitous Sp1 and Sp3 transcription factors
Source: PubMed Central journal article supplement (PMC6547542; doi:10.1186/s13072-019-0282-9), 2019-06-04
Supplement: 13072_2019_282_MOESM5_ESM.pdf [file 13072_2019_282_MOESM5_ESM.pdf]

# Supplementary Dataset 4: Sequencing data

| <b>ESC-ATAC-Seq</b>                                                             | <b>No. Reads</b> | <b>mapped reads</b> | <b>alignment %</b> | <b>peaks</b> | <b>DHS filtered peaks</b>    |
|---------------------------------------------------------------------------------|------------------|---------------------|--------------------|--------------|------------------------------|
| <b>Merged filtered peaks</b>                                                    |                  |                     |                    |              | 37834                        |
| A17Lox WT                                                                       | 119220592        | 116246038           | 97.51              | 36603        | 24671                        |
| E14 WT                                                                          | 241328968        | 233172049           | 96.62              | 52187        | 32017                        |
| A17Lox Sp1 <sup>+/<math>\Delta</math>DBD</sup> (1)                              | 126086922        | 123224749           | 97.73              | 43303        | 27953                        |
| A17Lox Sp1 <sup>+/<math>\Delta</math>DBD</sup> (2)                              | 120502300        | 117170411           | 97.24              | 53672        | 32025                        |
| A17Lox Sp1 <sup>-/-</sup>                                                       | 142343688        | 138464823           | 97.28              | 40998        | 26507                        |
| A17Lox Sp1 <sup><math>\Delta</math>DBD/<math>\Delta</math>DBD</sup>             | 110603648        | 103016238           | 93.14              | 36966        | 24437                        |
| E14 Sp1 <sup><math>\Delta</math>DBD/<math>\Delta</math>DBD</sup>                | 197196262        | 190767664           | 96.74              | 50030        | 30522                        |
| <b>Sp1 ChIP data in ESC</b>                                                     | <b>No. Reads</b> | <b>mapped reads</b> | <b>alignment %</b> | <b>peaks</b> | <b>high confidence peaks</b> |
| A17Lox WT                                                                       | 22763937         | 20588794            | 90.44              | 33021        | 17606                        |
| A17Lox Sp1 <sup>+/<math>\Delta</math>DBD</sup> (1)                              | 29910896         | 27026859            | 90.36              | 42283        | 17652                        |
| A17Lox Sp1 <sup>+/<math>\Delta</math>DBD</sup> (2)                              | 33050437         | 29069050            | 87.95              | 23848        | 15654                        |
| A17Lox Sp1 <sup><math>\Delta</math>DBD/<math>\Delta</math>DBD</sup>             |                  |                     |                    |              |                              |
| <b>Sp3 ChIP data in ESC</b>                                                     | <b>No. Reads</b> | <b>mapped reads</b> | <b>alignment %</b> | <b>peaks</b> | <b>high confidence peaks</b> |
| A17Lox WT                                                                       | 22332095         | 21634384            | 96.88              | 37652        | 22381                        |
| A17Lox Sp3 ChIP in Sp1 <sup><math>\Delta</math>DBD/<math>\Delta</math>DBD</sup> | 27599919         | 26695646            | 96.72              | 31257        | 19519                        |
| A17Lox Sp3 ChIP in Sp1 <sup>+/<math>\Delta</math>DBD</sup> (1)                  | 23478817         | 22839127            | 97.28              | 41100        | 23526                        |
| A17Lox Sp3 ChIP in Sp1 <sup>+/<math>\Delta</math>DBD</sup> (2)                  | 28238633         | 27542242            | 97.53              | 31614        | 20438                        |
| A17Lox Sp3 ChIP in Sp1 <sup>-/-</sup>                                           | 32364500         | 31712735            | 97.99              | 41052        | 23224                        |
| <b>Flk1 ATAC-Seq</b>                                                            | <b>No. Reads</b> | <b>mapped reads</b> | <b>alignment %</b> | <b>peaks</b> | <b>DHS filtered peaks</b>    |
| <b>Merged filtered peaks</b>                                                    |                  |                     |                    |              | 32759                        |
| A17Lox WT                                                                       | 89251922         | 86712705            | 97.16              | 38324        | 30188                        |
| A17Lox Sp1 <sup>+/<math>\Delta</math>DBD</sup> 1                                | 113505040        | 110820646           | 97.64              | 33763        | 27487                        |
| A17Lox Sp1 <sup>+/<math>\Delta</math>DBD</sup> 2                                | 86405570         | 83994855            | 97.21              | 28902        | 24424                        |
| A17Lox Sp1 <sup><math>\Delta</math>DBD/<math>\Delta</math>DBD</sup>             | 95677704         | 93089622            | 97.3               | 31808        | 26249                        |
| A17Lox Sp1 <sup>-/-</sup>                                                       | 115788284        | 106884165           | 92.31              | 22587        | 18530                        |
| E14 WT                                                                          | 82811374         | 80062036            | 96.68              | 37504        | 31120                        |
| E14 Sp1 <sup><math>\Delta</math>DBD/<math>\Delta</math>DBD</sup>                | 82732522         | 79944436            | 96.63              | 32234        | 27042                        |
| <b>Sp1 ChIP data in Flk1 cells</b>                                              | <b>No. Reads</b> | <b>mapped reads</b> | <b>alignment %</b> | <b>peaks</b> | <b>high confidence peaks</b> |
| A17Lox WT Sp1 ChIP                                                              | 31967487         | 30474010            | 95.33              | 20055        | 16702                        |
| A17Lox Sp1 <sup>+/<math>\Delta</math>DBD</sup> (1) Sp1 ChIP                     | 36766368         | 35422322            | 96.34              | 9688         | 9252                         |
| A17Lox Sp1 <sup>+/<math>\Delta</math>DBD</sup> (2) Sp1 ChIP                     | 39894821         | 38378452            | 96.2               | 8851         | 8485                         |
| <b>Sp3 ChIP data in Flk1 cells</b>                                              | <b>No. Reads</b> | <b>mapped reads</b> | <b>alignment %</b> | <b>peaks</b> | <b>high confidence peaks</b> |
| A17Lox WT Sp3 ChIP                                                              | 41922325         | 39713976            | 94.73              | 31505        | 20053                        |
| A17Lox Sp1 <sup><math>\Delta</math>DBD/<math>\Delta</math>DBD</sup> Sp3 ChIP    | 31759643         | 30975632            | 97.53              | 22132        | 17288                        |
| A17Lox Sp1 <sup>+/<math>\Delta</math>DBD</sup> (1) Sp3 ChIP                     | 41492766         | 39874282            | 96.1               | 36877        | 21541                        |
| A17Lox Sp1 <sup>+/<math>\Delta</math>DBD</sup> (2) Sp3 ChIP                     | 44082985         | 42606458            | 96.65              | 28461        | 19477                        |
